# Supplementary material for: Effect of acid treatment on boosting the photoelectrochemical performance of doped and codoped α-Fe2O3 photoanodes
Source: Royal Society of Chemistry journal article supplement (doi:10.1039/d3ra01576a), 2023-01-01
Supplement: d3ra01576a1.pdf [file d3ra01576a1.pdf]

### **Supporting Information**

Effect of acid treatment on boosting the photoelectrochemical performance of doped and codoped  $\alpha$ -Fe<sub>2</sub>O<sub>3</sub> photoanodes

Yujie Wang\*, Jinlong Liu, Jie Xu, Xiaobin Hao

*Address:* School of Materials and Chemical Engineering, Chuzhou University,  
Chuzhou, Anhui 239000, China

*Email:* wangyj120@163.com

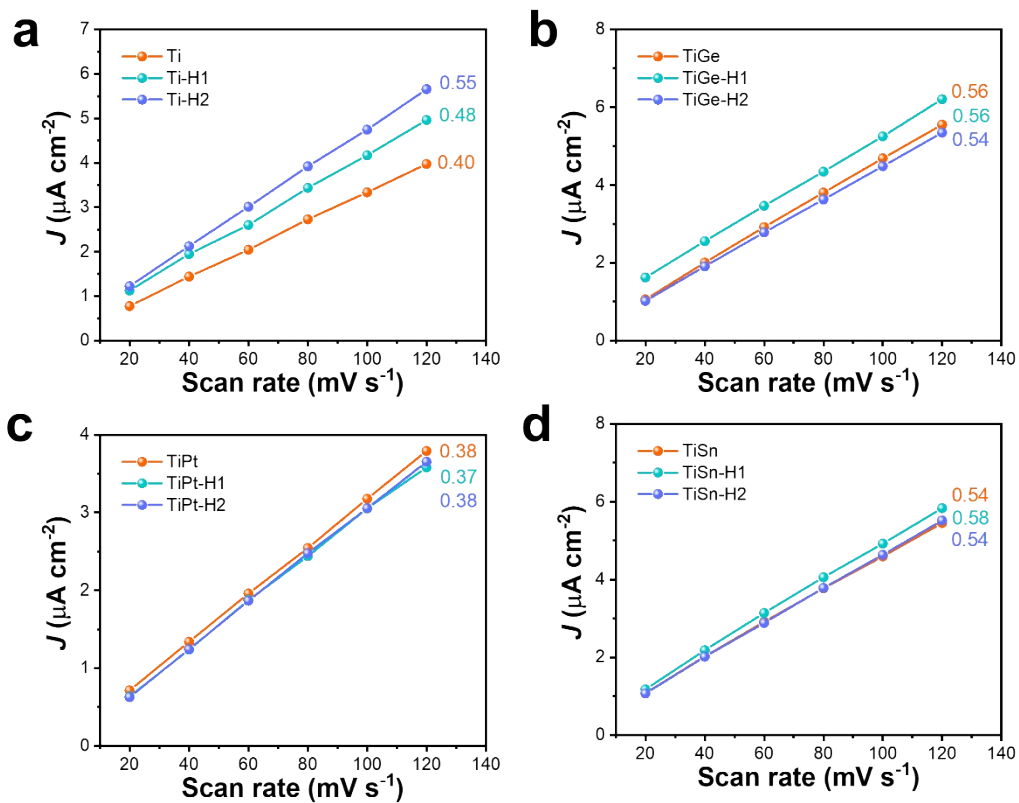

Fig. S1. The plots of the capacity current differences (at 0 V vs. Hg/HgO) against scan rates, where the linear slope equals twice the  $C_{dl}$ .

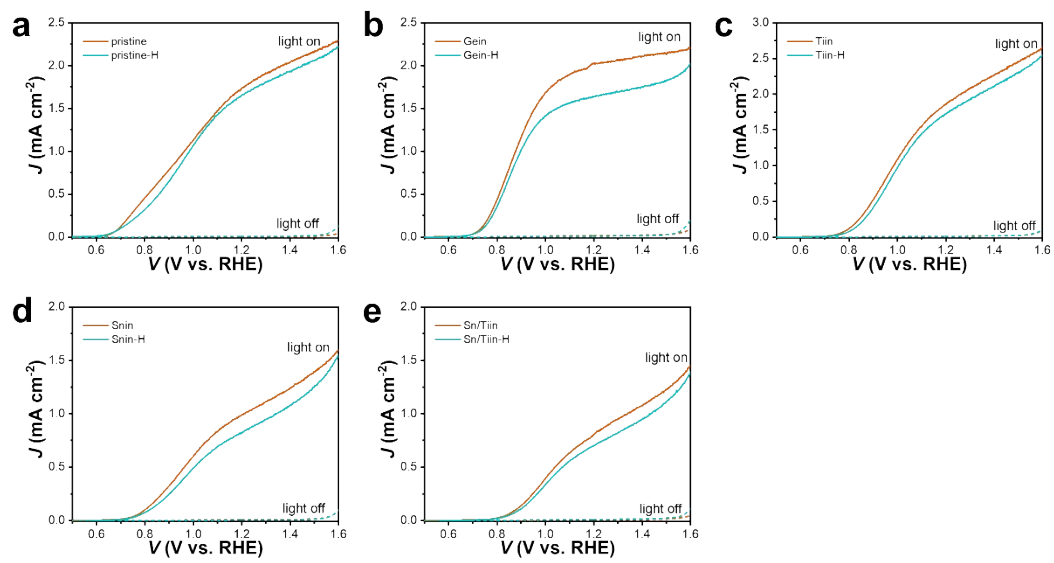

Fig. S2. Photocurrent density vs. potential (J-V) curves of the (a) pristine, (b)  $\text{Ge}_{\text{in}}$ , (c)  $\text{Ti}_{\text{in}}$ , (d)  $\text{Sn}_{\text{in}}$  and (e)  $\text{Sn}/\text{Ti}_{\text{in}}$  photoanodes before and after HCl treatments for 1 h.

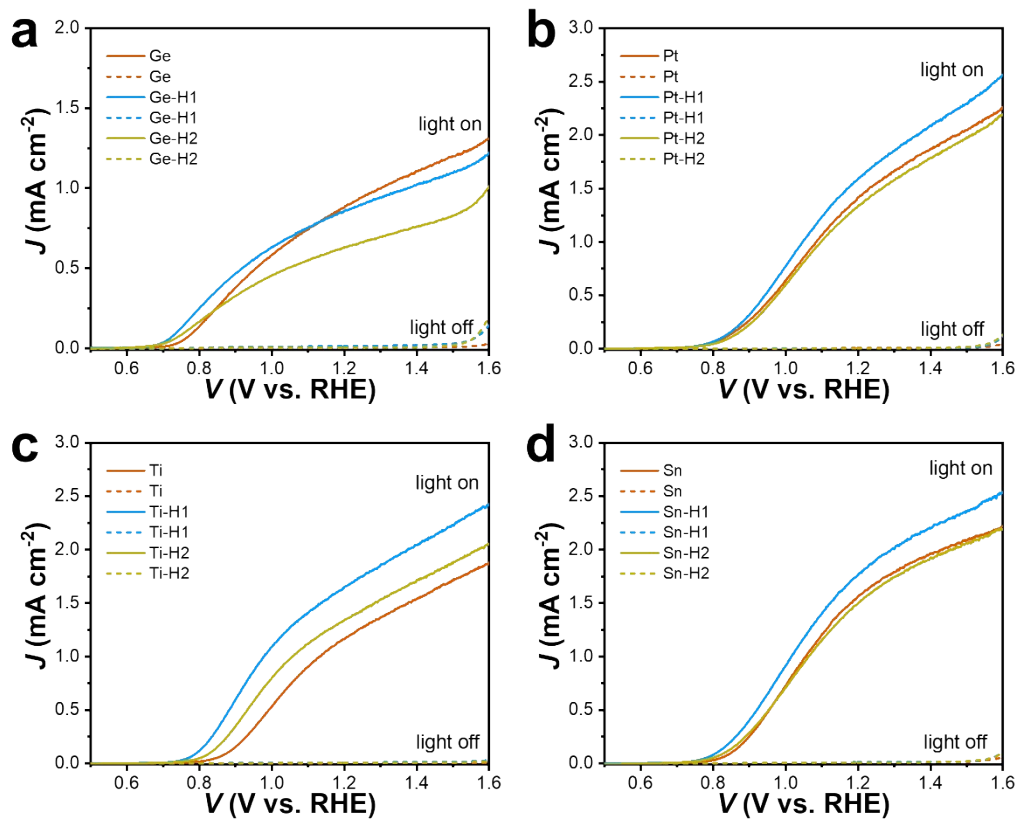

Fig. S3. Photocurrent density vs. potential ( $J$ - $V$ ) curves of the (a) Ge, (b) Pt, (c) Ti and (d) Sn electrodes before and after HCl treatments for 1 h and 2 h.

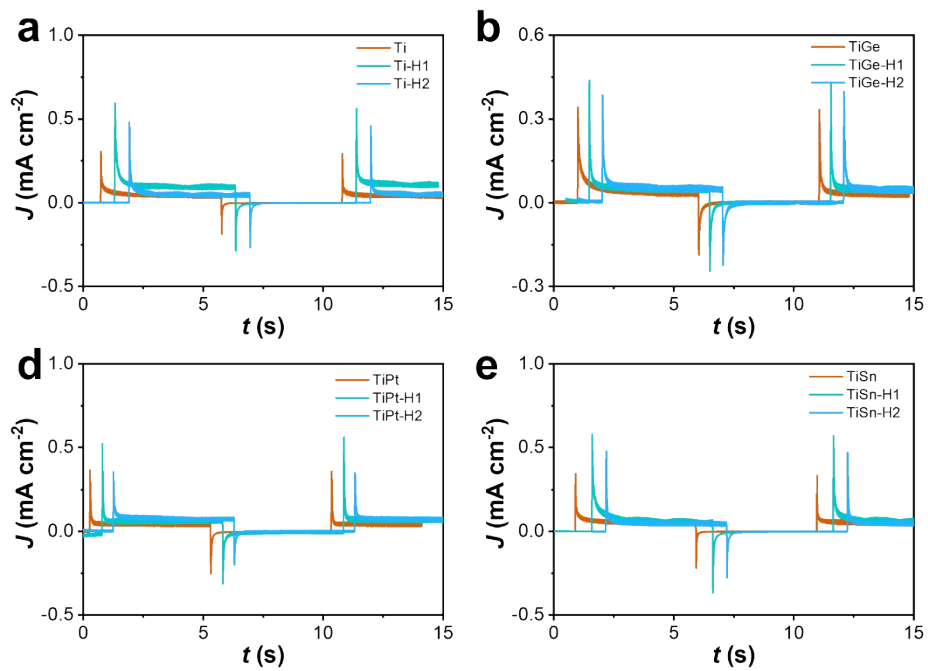

Fig. S4. Transient photocurrents of the (a) Ti, (b) TiGe, (c) TiPt and (d) TiSn photoanodes measured at 0.84 V<sub>RHE</sub>.

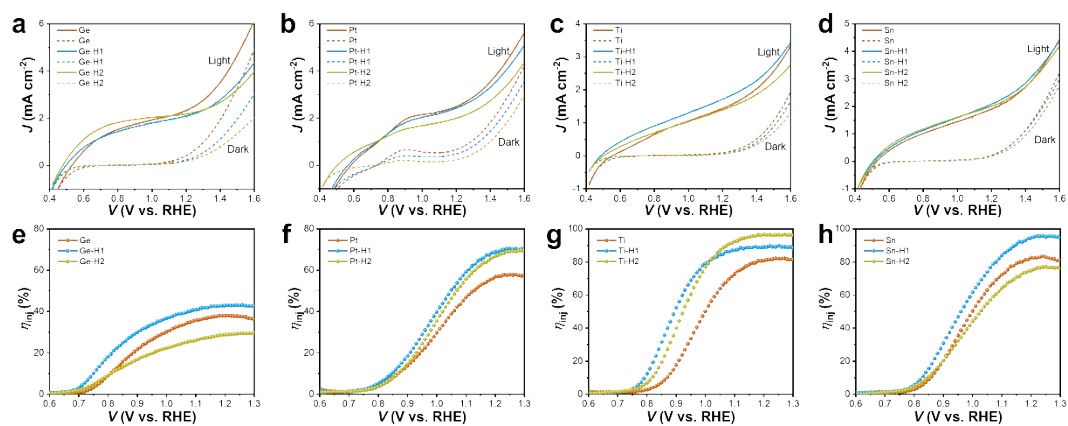

Fig. S5. Photocurrent density vs. potential ( $J$ - $V$ ) curves of the (a) Ge, (b) Pt, (c) Ti and (d) Sn photoanodes before and after HCl treatments for 1 h and 2 h measured in electrolyte with  $H_2O_2$  as the hole trapping agent. Calculated charge injection efficiencies ( $\eta_{inj}$ ) of the (e) Ge, (f) Pt, (g) Ti and (h) Sn photoanodes before and after HCl treatments for 1 h and 2 h.

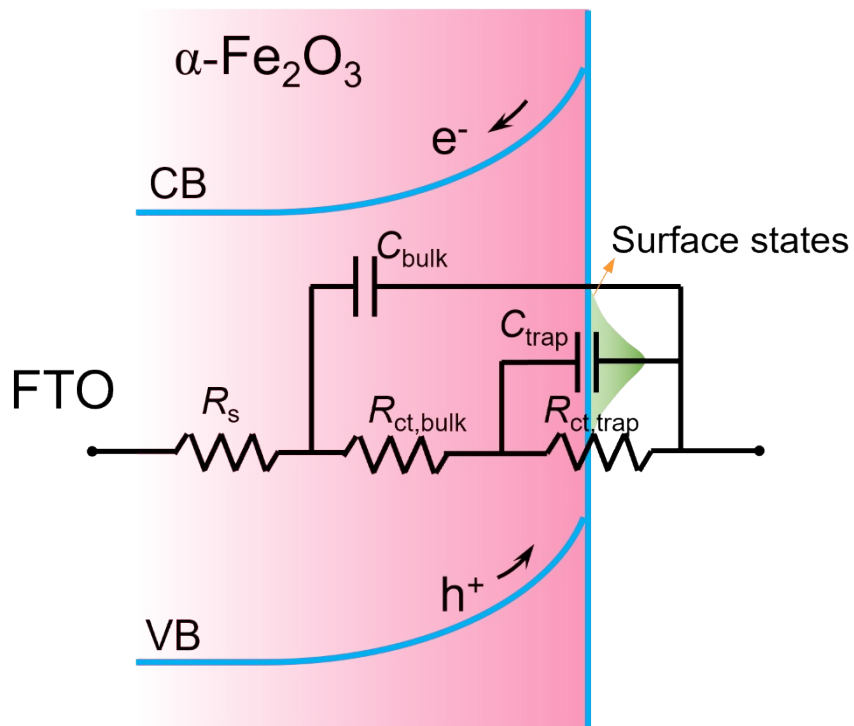

Fig. S6. Equivalent circuit for fitting the charge resistances and capacities in the  $\alpha\text{-Fe}_2\text{O}_3$  photoanode.

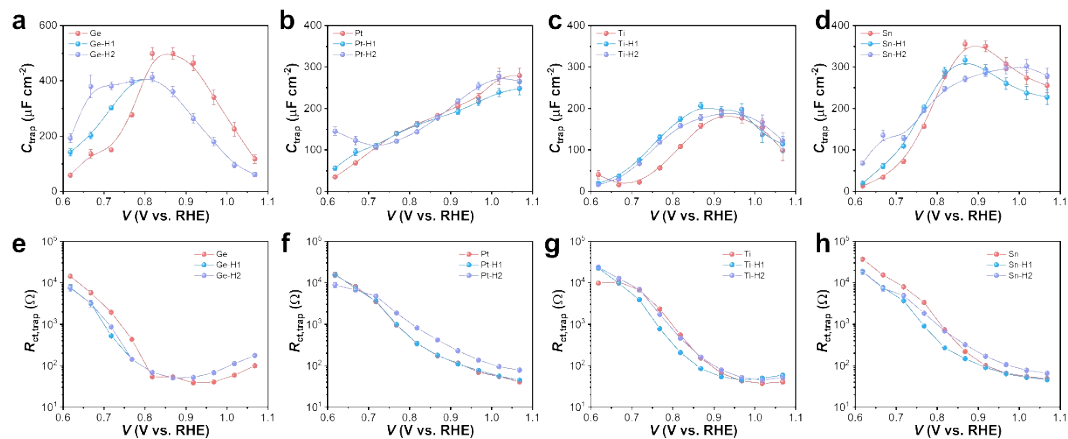

Fig. S7. Trap capacities ( $C_{\text{trap}}$ ) of the (a) Ge, (b) Pt, (c) Ti and (d) Sn photoanodes before and after HCl treatments for 1 h and 2 h. Charge transfer resistances ( $R_{\text{ct,trap}}$ ) of the (e) Ge, (f) Pt, (g) Ti and (h) Sn photoanodes before and after HCl treatments for 1 h and 2 h.
